# Supplementary material
Source: ML conference proceedings conference paper supplement (https://proceedings.neurips.cc/paper_files/paper/2022/hash/6590cb829f5ffef50050f3e5845fbb4c-Abstract.html)
Supplement: Supplementary file 1 [file 6590cb829f5ffef50050f3e5845fbb4c-Supplemental-Conference.pdf]

# Supplementary Material

## A Proofs of Lemmas 7 and 8

The proofs of Lemmas 7 and 8 require additional notations and some preliminary results. Returning to the process depicted in Algorithm 3, let the conditional probability measures for all  $i \in [K]$  be

$$\mathbf{Q}_i(\cdot) = \mathbb{P}(\cdot \mid i^* = i),$$

and denote  $\mathbf{Q}_0$  the probability over the loss sequence when  $\Delta = 0$ , and all actions incur the same loss. Next, let  $\mathcal{F}$  be the  $\sigma$ -algebra generated by the player's observations  $\{\ell_{t,I_t}\}_{t \in [T]}$ . Denote the *total variation* distance between  $\mathbf{Q}_i$  and  $\mathbf{Q}_j$  on  $\mathcal{F}$  by

$$d_{TV}^{\mathcal{F}}(\mathbf{Q}_i, \mathbf{Q}_j) = \sup_{E \in \mathcal{F}} |\mathbf{Q}_i(E) - \mathbf{Q}_j(E)|.$$

We also denote  $\mathbb{E}_{\mathbf{Q}_i}$  as the expectation on the conditional distribution  $\mathbf{Q}_i$ . Lastly, we present the following result from Dekel et al. [8].

**Lemma 10** ([8, Lemma 3 and Corollary 1]). *For any  $i \in [K]$  it holds that*

$$\frac{1}{K} \sum_{i=1}^K d_{TV}^{\mathcal{F}}(\mathbf{Q}_0, \mathbf{Q}_i) \leq \frac{\Delta}{\sigma\sqrt{K}} \sqrt{\mathbb{E}_{\mathbf{Q}_0}[\mathcal{S}_T] \log_2 T},$$

and specifically for  $K = 2$ ,

$$d_{TV}^{\mathcal{F}}(\mathbf{Q}_1, \mathbf{Q}_2) \leq (\Delta/\sigma) \sqrt{2 \mathbb{E}[\mathcal{S}_T] \log_2 T}.$$

With this Lemma at hand, we are ready to prove Lemmas 7 and 8.

**Proof of Lemma 7.** Observe that  $\mathcal{R}_T \geq 0$  by the construction in Algorithm 3. Then, if  $\mathbb{E}[\mathcal{S}_T] \geq 1/(c\Delta^2 \log_2^3 T)$  for  $c = 40^2$  we have that  $\mathbb{E}[\mathcal{R}_T + \mathcal{S}_T] \geq 1/(c\Delta^2 \log_2^3 T)$ , which guarantees the desired lower bound. On the other hand, applying Lemma 10 when  $\mathbb{E}[\mathcal{S}_T] \leq 1/(c\Delta^2 \log_2^3 T)$ , we get

$$d_{TV}^{\mathcal{F}}(\mathbf{Q}_1, \mathbf{Q}_2) \leq (1/\sigma) \sqrt{2/(c \log_2^2 T)} \leq \frac{1}{3}. \quad (13)$$

Let  $E$  be the event that arm  $i = 1$  is picked at least  $T/2$  times, namely

$$E = \left\{ \sum_{t \in [T]} \mathbb{1}\{I_t = 1\} \geq T/2 \right\},$$

and let  $E^c$  be its complementary event. If  $\mathbf{Q}_1(E) \leq \frac{1}{2}$  then,

$$\begin{aligned} \mathbb{E}[\mathcal{R}_T] &\geq \mathbb{E}_{\mathbf{Q}_1}[\mathcal{R}_T | E^c] \cdot \mathbf{Q}_1(E^c) \cdot \mathbb{P}(i^* = 1) & (\mathcal{R}_T \geq 0) \\ &\geq \Delta T/8. & (\mathcal{R}_T \geq \Delta T/2 \text{ under the conditional event}) \end{aligned}$$

If  $\mathbf{Q}_1(E) > \frac{1}{2}$  then from Eq. (13) we obtain that  $\mathbf{Q}_2(E) \geq \frac{1}{6}$ . This implies,

$$\begin{aligned} \mathbb{E}[\mathcal{R}_T] &\geq \mathbb{E}_{\mathbf{Q}_2}[\mathcal{R}_T | E] \cdot \mathbf{Q}_2(E) \cdot \mathbb{P}(i^* = 2) & (\mathcal{R}_T \geq 0) \\ &\geq \Delta T/24. & (\mathcal{R}_T \geq \Delta T/2 \text{ under the conditional event}) \end{aligned}$$

Since  $\mathcal{S}_T \geq 0$  we conclude the proof.  $\blacksquare$

**Proof of Lemma 8.** The proof is comprised of two steps. First, we prove the lower bound for deterministic players that make at most  $K^{1/3}T^{2/3}$  switches. Towards the end of the proof we generalize our claim to any deterministic player. To prove the former, we present the next Lemma, which follows from the proof in [8, Thm 2]. For completeness the proof for this Lemma is provided at the end of the section.

**Lemma 11.** *For any deterministic player that makes at most  $\Delta T$  switches over the sequence defined in Algorithm 3,*

$$\mathbb{E}[\mathcal{R}_T + \mathcal{S}_T] \geq \frac{1}{3}\Delta T + \mathbb{E}_{\mathbf{Q}_0}[\mathcal{S}_T] - \frac{18\Delta^2 T}{\sqrt{K}} \log_2^{3/2} T \sqrt{\mathbb{E}_{\mathbf{Q}_0}[\mathcal{S}_T]},$$

provided that  $\Delta \leq 1/6$  and  $T > 6$ .

Setting  $\Delta = \frac{1}{6}$  in Lemma 11 we get,

$$\mathbb{E}[\mathcal{R}_T + \mathcal{S}_T] \geq \frac{1}{18}T + \mathbb{E}_{\mathcal{Q}_0}[\mathcal{S}_T] - \frac{T \log_2^{3/2} T}{2\sqrt{K}} \sqrt{\mathbb{E}_{\mathcal{Q}_0}[\mathcal{S}_T]} \quad (14)$$

In addition, recall that we are interested in deterministic players that satisfy the following regret guarantee in the adversarial regime,

$$\mathbb{E}[\mathcal{R}_T + \mathcal{S}_T] \leq \mathcal{O}(K^{1/3}T^{2/3}). \quad (15)$$

Hence, taking Eqs. (14) and (15) we have,

$$\mathcal{O}(K^{1/3}T^{2/3}) \geq \frac{1}{18}T + \mathbb{E}_{\mathcal{Q}_0}[\mathcal{S}_T] - \frac{T \log_2^{3/2} T}{2\sqrt{K}} \sqrt{\mathbb{E}_{\mathcal{Q}_0}[\mathcal{S}_T]} \quad (16)$$

Now, assuming that  $\sqrt{\mathbb{E}_{\mathcal{Q}_0}[\mathcal{S}_T]} < \frac{\sqrt{K}}{10 \log_2^{3/2} T}$  we get that for every  $K < T$ :

$$\begin{aligned} \mathcal{O}(K^{1/3}T^{2/3}) &\geq \frac{1}{18}T + \mathbb{E}_{\mathcal{Q}_0}[\mathcal{S}_T] - \frac{T \log_2^{3/2} T}{2\sqrt{K}} \sqrt{\mathbb{E}_{\mathcal{Q}_0}[\mathcal{S}_T]} \\ &> \frac{T}{18} - \frac{T}{20} = \Omega(T) \end{aligned}$$

Which is a contradiction. Therefore, in our case,  $\sqrt{\mathbb{E}_{\mathcal{Q}_0}[\mathcal{S}_T]} \geq \frac{\sqrt{K}}{10 \log_2^{3/2} T}$ . Furthermore, Lemma 11 also holds for any deterministic player that makes at most  $K^{1/3}T^{2/3}$  switches, which is less than  $\Delta T$  under the condition that  $\Delta \geq K^{1/3}T^{-1/3}$ . Suppose that  $\mathbb{E}_{\mathcal{Q}_0}[\mathcal{S}_T] \leq K^{1/3}T^{2/3}/(60^2 \log_2^3 T)$ , then choosing  $\frac{1}{6} \geq \Delta = \sqrt{K}/(60\sqrt{\mathbb{E}_{\mathcal{Q}_0}[\mathcal{S}_T]} \log_2^{3/2} T) \geq K^{1/3}T^{-1/3}$  we obtain,

$$\mathbb{E}[\mathcal{R}_T + \mathcal{S}_T] \geq \mathbb{E}_{\mathcal{Q}_0}[\mathcal{S}_T] + \frac{\sqrt{K}T}{3 \cdot 10^3 \sqrt{\mathbb{E}_{\mathcal{Q}_0}[\mathcal{S}_T]} \log_2^{3/2} T}. \quad (17)$$

Taking both observations in Eqs. (15) and (17) implies that  $\mathbb{E}_{\mathcal{Q}_0}[\mathcal{S}_T] \geq \Omega(K^{1/3}T^{2/3}/\log_2^3 T)$ . To put simply, we have shown that for any deterministic player that makes at most  $K^{1/3}T^{2/3}$  switches and holds Eq. (15), then

$$\mathbb{E}_{\mathcal{Q}_0}[\mathcal{S}_T] \geq \Omega(K^{1/3}T^{2/3}/\log_2^3 T), \quad (18)$$

independently of  $\Delta$ . On the other hand, for any  $\Delta > 0$ , since  $\mathcal{Q}_i(\mathcal{S}_T > K^{1/3}T^{2/3}) = 0$  for any  $i \in [K] \cup \{0\}$ ,

$$\begin{aligned} \mathbb{E}_{\mathcal{Q}_0}[\mathcal{S}_T] - \mathbb{E}_{\mathcal{Q}_i}[\mathcal{S}_T] &= \sum_{s=1}^{\lfloor K^{1/3}T^{2/3} \rfloor} (\mathcal{Q}_0(\mathcal{S}_T \geq s) - \mathcal{Q}_i(\mathcal{S}_T \geq s)) \\ &\leq K^{1/3}T^{2/3} \cdot d_{\text{TV}}^{\mathcal{F}}(\mathcal{Q}_0, \mathcal{Q}_i). \end{aligned}$$

Averaging over  $i$  and rearranging terms we get,

$$\begin{aligned} \mathbb{E}[\mathcal{S}_T] &\geq \mathbb{E}_{\mathcal{Q}_0}[\mathcal{S}_T] - \frac{T^{2/3}}{K^{2/3}} \sum_{i=1}^K d_{\text{TV}}^{\mathcal{F}}(\mathcal{Q}_0, \mathcal{Q}_i) \\ &\geq \mathbb{E}_{\mathcal{Q}_0}[\mathcal{S}_T] - 9\Delta K^{-1/6}T^{2/3} \log_2^{3/2} T \sqrt{\mathbb{E}_{\mathcal{Q}_0}[\mathcal{S}_T]} \quad (\text{Lemma 10}) \end{aligned}$$

Using Eq. (18) and the assumption  $\mathcal{S}_T \leq K^{1/3}T^{2/3}$ , we get that for any  $\Delta \leq aK^{1/3}T^{-1/3} \log_2^{-9/2} T$  for some constant  $a > 0$  and sufficiently large  $T$ ,

$$\mathbb{E}[\mathcal{R}_T + \mathcal{S}_T] \geq \mathbb{E}[\mathcal{S}_T] \geq \Omega(K^{1/3}T^{2/3}/\log_2^3 T). \quad (19)$$

The above lower bound holds for any deterministic player that makes at most  $K^{1/3}T^{2/3}$  switches. However, given a general deterministic player denoted by  $A$  we can construct an alternative player,

denoted by  $\tilde{A}$ , which is identical to  $A$ , up to the round  $A$  performs the  $\lfloor \frac{1}{2}K^{1/3}T^{2/3} \rfloor$  switch. After that  $\tilde{A}$  employs the Tsalis-INF algorithm with blocks of size  $B = \lceil 4K^{-1/3}T^{1/3} \rceil$  for the remaining rounds (see Algorithm 2). Clearly, the number of switches this block algorithm does is upper bounded by  $T/B + 1 \leq K^{1/3}T^{2/3}/2$ , therefore  $\tilde{A}$  performs at most  $K^{1/3}T^{2/3}$  switches. We denote,  $\mathcal{R}_T^A + \mathcal{S}_T^A$  the regret with switching cost of player  $A$  and  $\mathcal{R}_T^{\tilde{A}} + \mathcal{S}_T^{\tilde{A}}$  respectively. Observe that when  $\mathcal{S}_T^A < \lfloor \frac{1}{2}K^{1/3}T^{2/3} \rfloor$  we get,

$$\mathcal{R}_T^A + \mathcal{S}_T^A = \mathcal{R}_T^{\tilde{A}} + \mathcal{S}_T^{\tilde{A}}.$$

While for  $\mathcal{S}_T^A \geq \lfloor \frac{1}{2}K^{1/3}T^{2/3} \rfloor$ ,

$$\begin{aligned} \mathcal{R}_T^{\tilde{A}} + \mathcal{S}_T^{\tilde{A}} &\leq \mathcal{R}_T^A + \mathcal{S}_T^A + 21K^{1/3}T^{2/3} && (\text{Corollary 4 with } B = \lceil 4K^{-1/3}T^{1/3} \rceil) \\ &\leq \mathcal{R}_T^A + 63\mathcal{S}_T^A. && (\mathcal{S}_T^A \geq \frac{1}{3}K^{1/3}T^{2/3} \text{ for } T \geq 15) \end{aligned}$$

This implies that  $\mathcal{R}_T^A + \mathcal{S}_T^A \geq \frac{1}{63}(\mathcal{R}_T^{\tilde{A}} + \mathcal{S}_T^{\tilde{A}})$ , and together with Eq. (19) it concludes the proof.  $\blacksquare$

**Proof of Lemma 11.** We examine deterministic players that make at most  $\Delta T$  switches. Since  $\mathcal{S}_T \leq \Delta T$  we have that,

$$\begin{aligned} \mathbb{E}_{\mathcal{Q}_0}[\mathcal{S}_T] - \mathbb{E}_{\mathcal{Q}_i}[\mathcal{S}_T] &= \sum_{s=1}^{\lceil \Delta T \rceil} (\mathcal{Q}_0(\mathcal{S}_T \geq s) - \mathcal{Q}_i(\mathcal{S}_T \geq s)) \quad (\mathcal{Q}_i(\mathcal{S}_T > \Delta T) = 0 \quad \forall i \in [K] \cup \{0\}) \\ &\leq \Delta T \cdot d_{\text{TV}}^{\mathcal{F}}(\mathcal{Q}_0, \mathcal{Q}_i). \end{aligned}$$

Averaging over  $i$  and rearranging terms we get,

$$\mathbb{E}[\mathcal{S}_T] \geq \mathbb{E}_{\mathcal{Q}_0}[\mathcal{S}_T] - \frac{\Delta T}{K} \sum_{i=1}^K d_{\text{TV}}^{\mathcal{F}}(\mathcal{Q}_0, \mathcal{Q}_i). \quad (20)$$

Next we present the following Lemma that is taken verbatim from Dekel et al. [8].

**Lemma 12** ([8, Lemmas 4 and 5]). *Assume that  $T \geq \max\{K, 6\}$  and  $\Delta \leq 1/6$  then,*

$$\mathbb{E}[\mathcal{R}_T + \mathcal{S}_T] \geq \frac{\Delta T}{3} - \frac{\Delta T}{K} \sum_{i=1}^K d_{\text{TV}}^{\mathcal{F}}(\mathcal{Q}_0, \mathcal{Q}_i) + \mathbb{E}[\mathcal{S}_T].$$

Using Lemma 12 together with Eq. (20) we obtain,

$$\begin{aligned} \mathbb{E}[\mathcal{R}_T + \mathcal{S}_T] &\geq \frac{\Delta T}{3} - \frac{2\Delta T}{K} \sum_{i=1}^K d_{\text{TV}}^{\mathcal{F}}(\mathcal{Q}_0, \mathcal{Q}_i) + \mathbb{E}_{\mathcal{Q}_0}[\mathcal{S}_T] \\ &\geq \frac{\Delta T}{3} - \frac{2\Delta^2 T}{\sigma\sqrt{K}} \sqrt{\mathbb{E}_{\mathcal{Q}_0}[\mathcal{S}_T] \log_2 T + \mathbb{E}_{\mathcal{Q}_0}[\mathcal{S}_T]} && (\text{Lemma 10}) \\ &= \frac{\Delta T}{3} - \frac{18\Delta^2 T}{\sqrt{K}} \log_2^{3/2} T \sqrt{\mathbb{E}_{\mathcal{Q}_0}[\mathcal{S}_T]} + \mathbb{E}_{\mathcal{Q}_0}[\mathcal{S}_T]. && (\sigma = 1/(9 \log_2 T)) \end{aligned}$$

Setting  $\sigma = 1/(9 \log_2 T)$  we conclude,

$$\mathbb{E}[\mathcal{R}_T + \mathcal{S}_T] \geq \frac{\Delta T}{3} - \frac{18\Delta^2 T}{\sqrt{K}} \log_2^{3/2} T \sqrt{\mathbb{E}_{\mathcal{Q}_0}[\mathcal{S}_T]} + \mathbb{E}_{\mathcal{Q}_0}[\mathcal{S}_T].$$

$\blacksquare$
